# Supplementary material for: Variation at position 350 in the Chikungunya virus 6K-E1 protein determines the sensitivity of detection in a rapid E1-antigen test
Source: PubMed Central journal article supplement (PMC5773492; doi:10.1038/s41598-018-19174-8), 2018-01-18
Supplement: 41598_2018_19174_MOESM1_ESM.pdf [file 41598_2018_19174_MOESM1_ESM.pdf]

**Supplementary Information**  
**Article in Scientific Reports**

**Variation at position 350 in the Chikungunya virus 6K-E1 protein determines the sensitivity of detection in a rapid E1-antigen test**

Aekkachai Tuekprakhon<sup>1,2</sup>, Emi E. Nakayama<sup>2,3¶</sup>, Koen Bartholomeeusen<sup>4¶</sup>, Orapim Puiprom<sup>2</sup>, Tadahiro Sasaki<sup>2</sup>, Ralph Huits<sup>5</sup>, Natthanej Luplertlop<sup>1</sup>, Nathamon Kosoltanapiwat<sup>1</sup>, Pannamas Maneekan<sup>6</sup>, Kevin K. Ariën<sup>4,7</sup>, Tatsuo Shioda<sup>2,3\*</sup>, and Pornsawan Leangwutiwong<sup>1\*</sup>.

<sup>1</sup> Department of Microbiology and Immunology, Faculty of Tropical Medicine, Mahidol University, Bangkok, Thailand

<sup>2</sup> Mahidol-Osaka Center for Infectious Diseases (MOCID), Faculty of Tropical Medicine, Mahidol University, Bangkok, Thailand

<sup>3</sup> Research Institute for Microbial Diseases (RIMD), Osaka University, Osaka, Japan

<sup>4</sup> Department of Biomedical Sciences, Institute of Tropical Medicine, Antwerp, Belgium

<sup>5</sup> Department of Clinical Sciences, Institute of Tropical Medicine, Antwerp, Belgium

<sup>6</sup> Department of Tropical Hygiene, Faculty of Tropical Medicine, Mahidol University, Bangkok, Thailand

<sup>7</sup> Department of Biomedical Sciences, University of Antwerp, Antwerp, Belgium

Variation at position 350 in the Chikungunya virus 6K-E1 protein determines the sensitivity of detection in a rapid E1-antigen test

¶These authors contributed equally to this work.

\*Corresponding authors: [shioda@biken.osaka-u.ac.jp](mailto:shioda@biken.osaka-u.ac.jp) (TS) and [pornsawan.lea@mahidol.ac.th](mailto:pornsawan.lea@mahidol.ac.th) (PL)

Supplementary Fig S1

| a            |                                                                                     |                                                                                     |                                                                                      |       |
|--------------|-------------------------------------------------------------------------------------|-------------------------------------------------------------------------------------|--------------------------------------------------------------------------------------|-------|
| CHIKV        | DAPI                                                                                | Alexa Flour 488                                                                     | Merge                                                                                | mAb   |
| ECSA (350E)  | 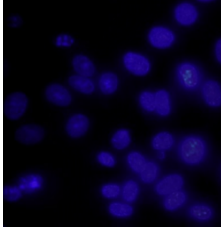   |    |    | CK47  |
| ECSA (350E)  |   |   |   | CK119 |
| Asian (350D) |  |  |  | CK47  |
| Asian (350D) |  |  |  | CK119 |
| ECSA (350D)  |  |  |  | CK47  |
| ECSA (350D)  |  |  |  | CK119 |
|              |                                                                                     |                                                                                     |                                                                                      |       |

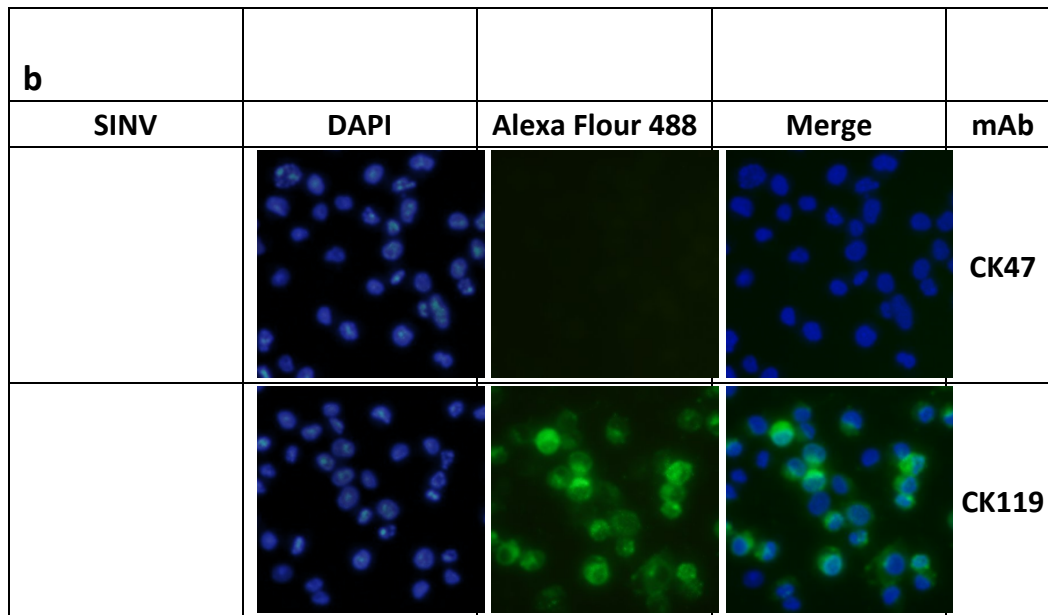

**Supplementary Fig S1. Indirect immunofluorescence analysis of CK47 and CK119 labeling of virus-infected cells.** CP10 (ECSA (350E)), ARUBA-15801125 (Asian (350D)), and Ross Low psg strain (ECSA (350D)) Chikungunya virus (CHIKV) -infected Vero cells **(a)** and Sindbis virus (SINV) -infected BHK cells **(b)** were stained with anti-CHIKV E protein monoclonal antibodies (mAb), CK47 or CK119; labeling was detected with Alexa Fluor 488-conjugated secondary antibody (green, middle). DAPI nuclear counterstain was used to stain nuclei of cells (blue, left). Alexa Fluor 488 and DAPI images were merged by ImageJ 1.50i, National Institutes of Health USA, and the merged images are shown on the right (Merge). Images represent results obtained from two independent experiments and were taken under 20X objective magnification using a fluorescence microscope (IX71, Olympus, Tokyo, Japan).

Supplementary Fig S2

a

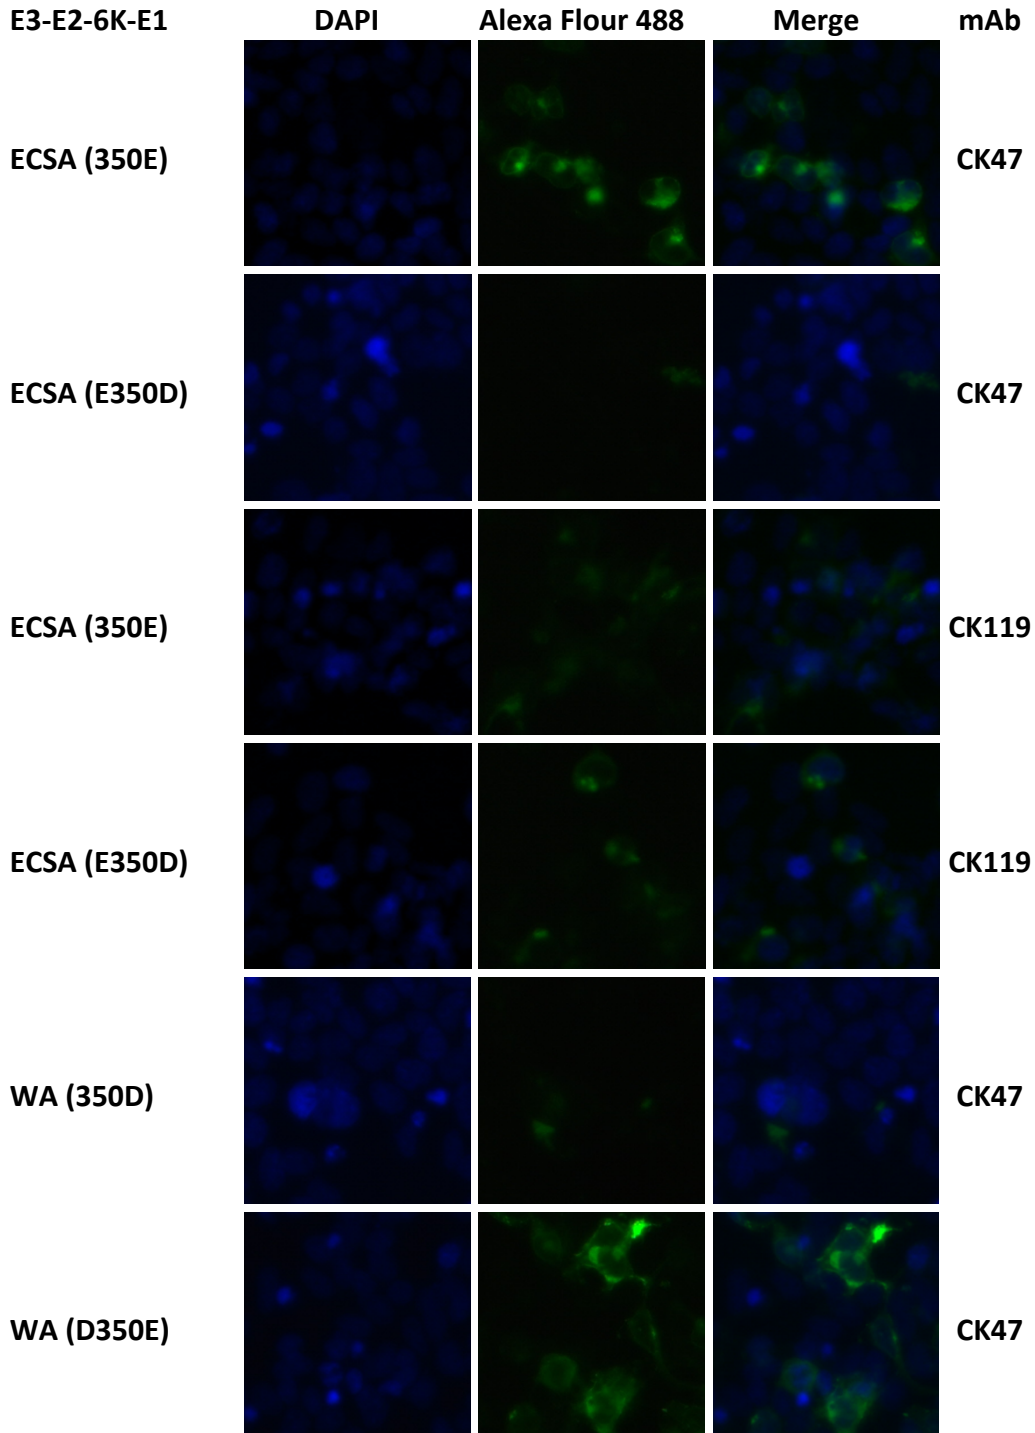

**WA (350D)**

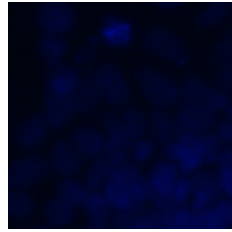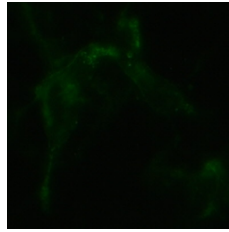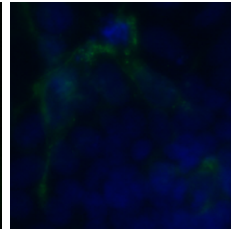

**CK119**

**WA (D350E)**

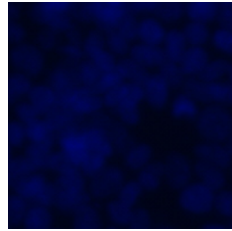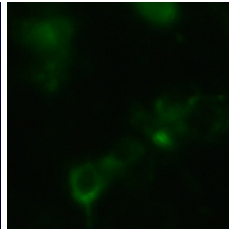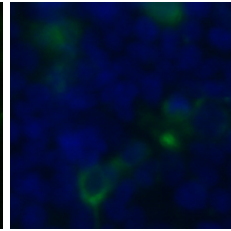

**CK119**

**Asian (350D)**

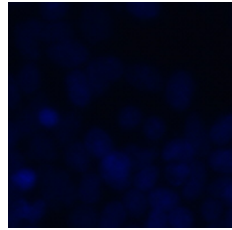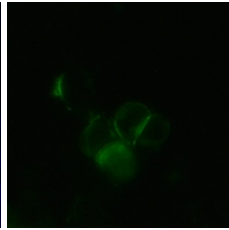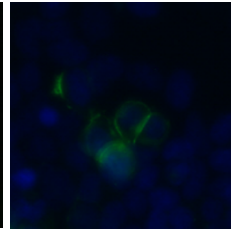

**CK47**

**Asian (D350E)**

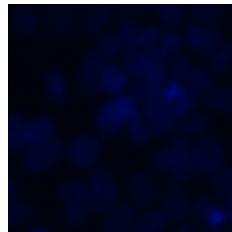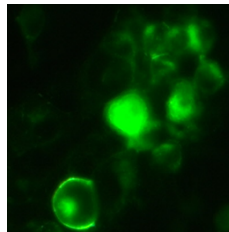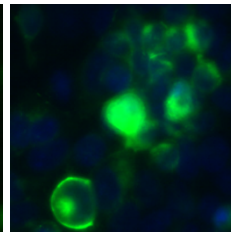

**CK47**

**Asian (350D)**

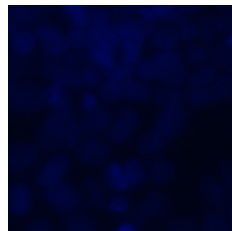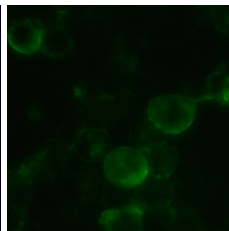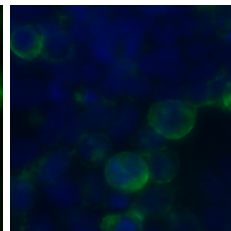

**CK119**

**Asian (D350E)**

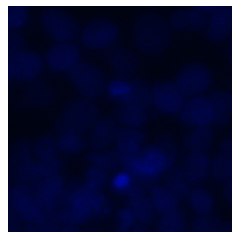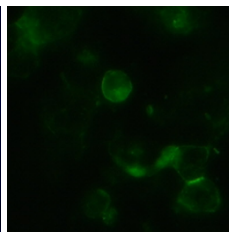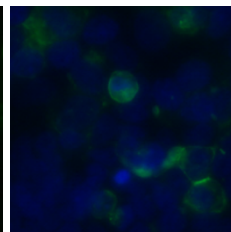

**CK119**

**b**

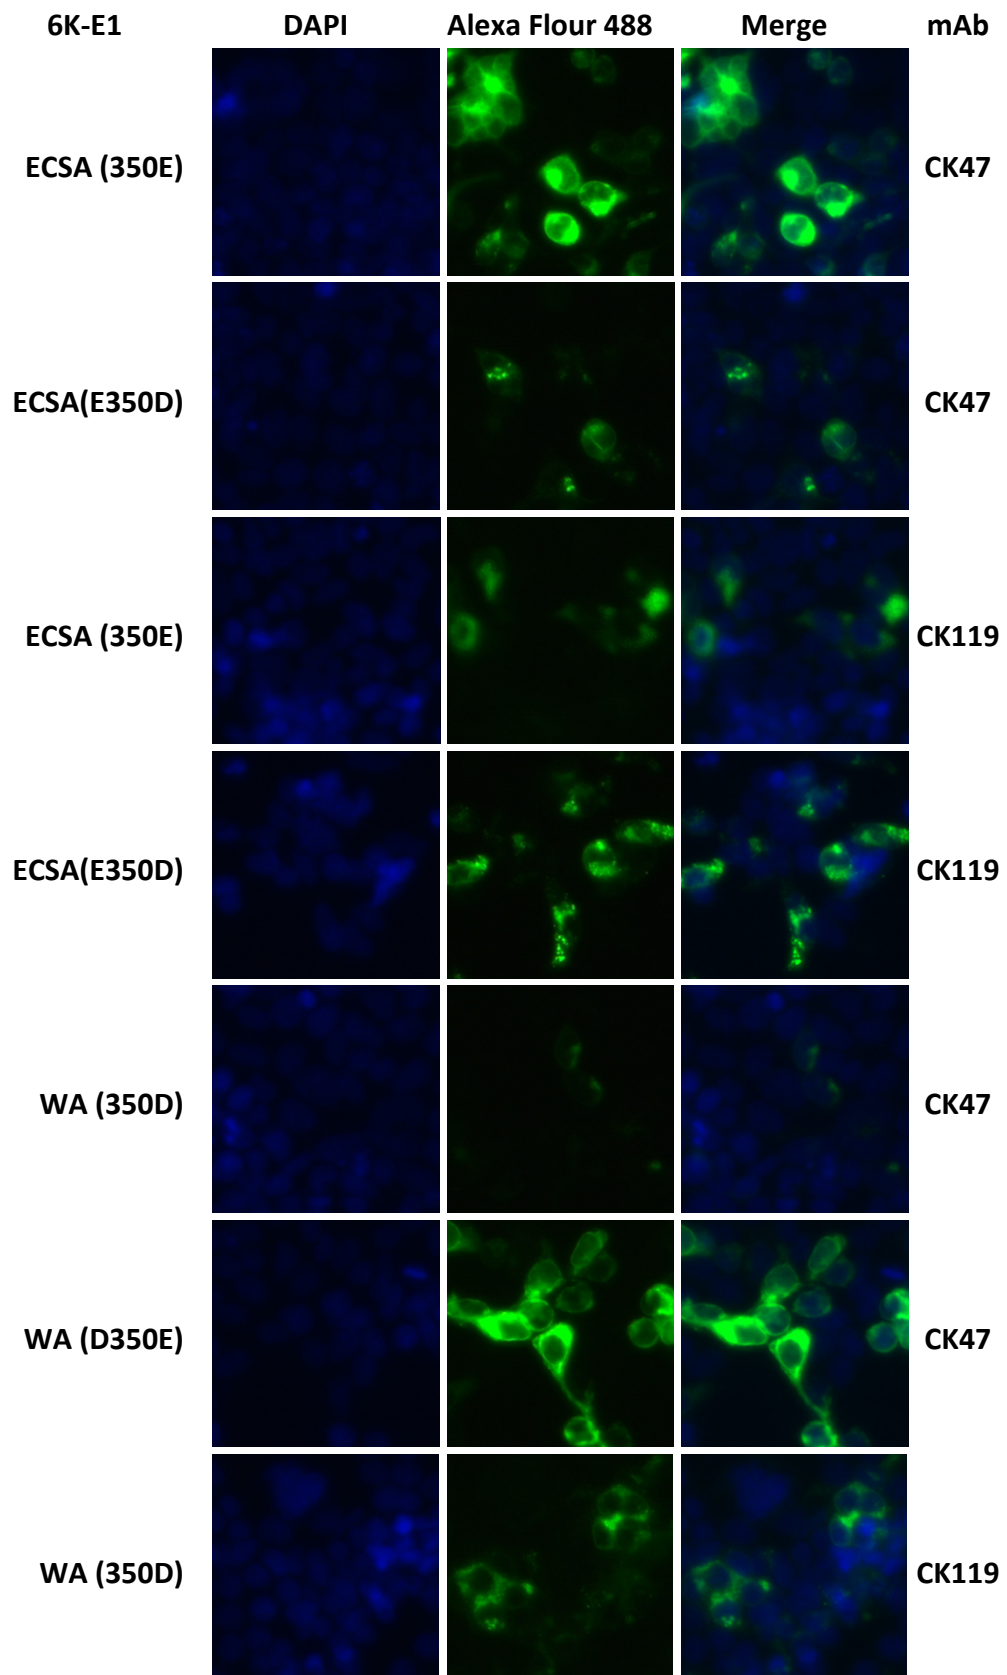

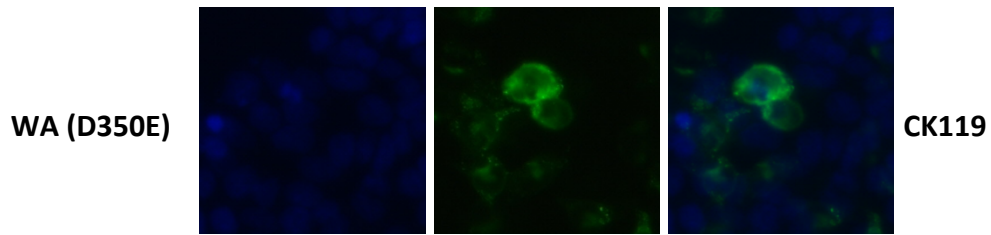

**Supplementary Fig S2. Indirect immunofluorescence analysis of CK47 and CK119 against CHIKV envelope proteins.** Plasmids were constructed to encode the full-length CHIKV envelope protein (E3-E2-6K-E1) from the CP10 (ECSA), 37997 (WA), or CK12-686 (Asian) strains, or mutant envelope proteins from CP10 bearing E350D, 37997 bearing D350E, or CK12-686 bearing D350E **(a)**. Plasmids encoding the short versions of the envelope protein (6K-E1) from the CP10 strain (ECSA) or 37997 (WA) strain bearing either the wild type or mutant residue at position 350 were also constructed **(b)**. Plasmids encoding CHIKV envelope protein were transfected into HEK293T cells and Indirect Immunofluorescence test was performed using CK47 and CK119. Alexa Fluor 488-conjugated secondary antibody was used to detect the expression of CHIKV envelope protein of transfected cells (middle, green). The counterstain DAPI was used to stain nuclei of HEK293T cells (left, blue). Alexa Fluor 488 and DAPI images were merged by ImageJ 1.50i, National Institutes of Health USA, and the merged images are shown on the right (Merge). Images are representative of results obtained from three independent experiments and were taken under 20x objective magnification using inverted microscope Axio observer Z.1, Carl Zeiss.

Supplementary Fig S3

| Amino acid at position 292 and 350 | DAPI | Alexa Flour 488 | Merge | mAb |
|------------------------------------|------|-----------------|-------|-----|
| 292V, 350E                         |      |                 |       | 47  |
| V292A, 350E                        |      |                 |       | 47  |
| 292V, E350D                        |      |                 |       | 47  |
| V292A, E350D                       |      |                 |       | 47  |
| 292V, 350E                         |      |                 |       | 119 |
| V292A, 350E                        |      |                 |       | 119 |
| 292V, E350D                        |      |                 |       | 119 |



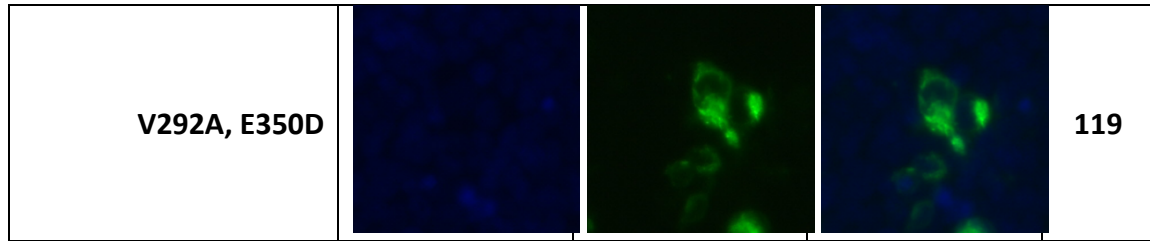

**Supplementary Fig S3. Indirect immunofluorescence analysis of CK47 and CK119 against CHIKV envelope proteins.** Site-directed mutagenesis was used to introduce mutations encoding substitutions at positions encoding residues 292 and 350 of 6K-E1 from the CP10 strain. Four possible combinations of 292 and 350 amino acid positions were produced: 292V + 350E, 292V + E350D, V292A + 350E, and V292A + E350D. Immunofluorescent images display reactivity of CK47 and CK119 against proteins of each of these four sequences. Alexa Fluor 488-conjugated secondary antibody was used to detect the expression of CHIKV envelope protein of transfected cells (middle, green) while DAPI nuclear counterstain was used to stain nuclei of HEK293T cells (left, blue). Alexa Fluor 488 and DAPI images were merged by ImageJ 1.50i, National Institutes of Health USA, and the merged images are shown on the right (Merge). Images are representative of results obtained from two independent experiments and were taken under 20x objective magnification using inverted microscope Axio observer Z.1, Carl Zeiss.

**Supplementary Table S1. Details of CHIKV strains in the phylogenetic tree in Fig 3a.**

| Country                 | Year | Strain            | Accession Number |
|-------------------------|------|-------------------|------------------|
| CHINA                   | 2010 | GD05              | JX088705.1       |
| CHINA                   | 2010 | GD113             | HQ846357.1       |
| FRANCE LA REUNION       | 2005 | IMTSSA6424C       | CBX54834.1       |
| THAILAND                | 2010 | CP9               | AB857809.1       |
| THAILAND                | 2010 | CP11              | AB857825.1       |
| THAILAND                | 2009 | CU-Chik683        | GU301781.1       |
| SINGAPORE               | 2008 | SGEHICHT077808    | FJ445484.2       |
| MALAYSIA                | 2008 | 0812bTw           | FJ807893.1       |
| CAMBODIA                | 2011 | V1024314 KH11 PVH | JQ861258.1       |
| MALAYSIA                | 2009 | 0901aTw           | FJ807895.1       |
| SRI LANKA               | 2008 | LK(PB)chik6008    | GU013529.2       |
| THAILAND                | 2010 | CP1               | AB857793.1       |
| THAILAND                | 2010 | CP13              | AB857833.1       |
| THAILAND                | 2010 | CP16              | AB857841.1       |
| MAURITIUS               | 2006 | D570/06           | ABJ98544.1       |
| CHINA                   | 2010 | DG892             | JQ065886.1       |
| SINGAPORE               | 2008 | SGEHICHS424108    | FJ445443.2       |
| THAILAND                | 2008 | CU-Chik10         | GU301780.1       |
| THAILAND                | 2010 | CP10              | AB857817.1       |
| THAILAND                | 2010 | CP7               | AB857801.1       |
| FRANCE LA REUNION       | 2006 | LR2006-OPY1       | ABD95938.1       |
| INDIA                   | 2006 | IND-06-MH2        | EF027136.1       |
| SRI LANKA               | 2007 | SL-CK1            | HM045801.1       |
| SRILANKA                | 2009 | SL111314          | AB455493.1       |
| CENTRAL AFRICA REPUBLIC | 1984 | DakAr B1          | HM045784.1       |
| CENTRAL AFRICA REPUBLIC | 1978 | HB78              | HM045822.1       |
| UGANDA                  | 1982 | UgAg4155          | HM045812.1       |
| BRAZIL                  | 2014 | H804705           | KP164569.1       |
| BRAZIL                  | 2016 | CHIKVgp2          | ANK58565.1       |
| BRAZIL                  | 2014 | BHI3734 H804698   | KP164568.1       |
| BRAZIL                  | 2014 | BHI3745 H804709   | KP164570.1       |
| CENTRAL AFRICA REPUBLIC |      | CAR256            | HM045793.1       |
| CONGO                   | 1960 | LSFS              | HM045809.1       |
| SOUTH AFRICA            | 1976 | AR18211           | HM045805.1       |
| SOUTH AFRICA            | 1976 | SAH2123           | HM045795.1       |
| TANZANIA                | 1953 | Ross Low psg      | HM045811.1       |
| TANZANIA                | 1952 | S27               | NC004162         |
| SOUTH AFRICA            | 1956 | Vereeniging       | HM045792.1       |
| INDIA                   | 1963 | I-634029          | HM045803.1       |
| INDIA                   | 1973 | PO731460          | HM045788.1       |
| INDIA                   | 1963 | Gibbs 63-263      | HM045813.1       |
| THAILAND                | 1978 | 3412-78           | HM045808.1       |

|               |      |                |                |
|---------------|------|----------------|----------------|
| THAILAND      | 1988 | 6441-88        | HM045789.1     |
| THAILAND      | 1995 | CO392-95       | HM045796.1     |
| THAILAND      | 1995 | K0146-95       | HM045802.1     |
| THAILAND      | 1995 | SV0444-95      | HM045787.1     |
| INDONESIA     | 1983 | JKT23574       | HM045791.1     |
| PHILIPPINES   | 1985 | Hu-85-NR-001   | HM045800.1     |
| INDONESIA     | 1985 | RSU1           | HM045797.1     |
| PHILIPPINES   | 1985 | PhH15483       | HM045790.1     |
| THAILAND      | 1975 | 1455-75        | HM045814.1     |
| BRAZIL        | 2014 | PER160 H803609 | KP164571.1     |
| BRAZIL        | 2014 | TR206 H804187  | KP164572.1     |
| CARIBIAN      | 2014 | G105           | LN898103.1     |
| COLUMBIA      | 2016 | COL.UF-1       | KX496989.1     |
| PUERTO RICO   | 2014 | PR-S6          | KR264951.1     |
| ARUBA         | 2016 | ARUBA-15800567 |                |
| ARUBA         | 2016 | ARUBA-15801125 | MF682981       |
| ARUBA         | 2016 | ARUBA-15801654 | MF682985       |
| ARUBA         | 2016 | ARUBA-15802650 |                |
| PHILIPPINES   | 2012 | CK12-686       | CWIH00000000.1 |
| PHILIPPINES   | 2012 | CK12-921       | CXNT00000000.1 |
| PUERTO RICO   | 2014 | PR-S4          | KR264949.1     |
| PHILIPPINES   | 2012 | CK12-559       | WHX00000000.1  |
| ARUBA         | 2016 | ARUBA-15801136 | MF682982       |
| ARUBA         | 2016 | ARUBA-15801160 | MF682983       |
| ARUBA         | 2016 | ARUBA-15801358 | MF682984       |
| COTE D IVOIRE | 1981 | ArA 2657       | HM045818.1     |
| SENEGAL       | 2005 | HD 180760      | HM045817.1     |
| COTE D IVOIRE | 1993 | ArA 30548      | HM045820.1     |
| NIGERIA       | 1964 | IbH35          | HM045786.1     |
| NIGERIA       | 1965 | IbAn4824       | HM045807.1     |
| SENEGAL       | 1983 | 37997          | AY726732.1     |
| SENEGAL       | 1966 | PM2951         | HM045785.1     |
| SENEGAL       | 1966 | SH2830         | HM045798.1     |
| SENEGAL       | 1966 | SH 3013        | HM045816.1     |
| SENEGAL       | 1979 | ArD 30237      | HM045815.1     |

---
